# Supplementary material
Source: Research Square preprint supplement (doi:10.21203/rs.3.rs-9575020/v1)
Supplement: Supplementary file 1 [file d66a569fea5054bfa7fc1754.docx]

**Supplementary Materials**

**4-Octyl Itaconate promotes dendritic cell tolerogenic properties via suppressing STING signaling to delay lupus onset**

**Supplementary Table 1.** Primers for q-PCR analysis.

| Target gene |  | Primer sequence (5'→3') |
| --- | --- | --- |
| **Mouse** |  |  |
| *Hprt* | Forward | CTTCCTCCTCAGACCGCTTTT |
|  | Reverse | CATCATCGCTAATCACGACGC |
| *Il-10* | Forward | GGACAACATACTGCTAACCGAC |
|  | Reverse | AGAAATCGATGACAGCGCCTC |
| *Tgfb1* | Forward | TGACGTCACTGGAGTTGTACGG |
|  | Reverse | GGTTCATGTCATGGATGGTGC |
| *Ifnb1* | Forward | ATGAGTGGTGGTTGCAGGC |
|  | Reverse | TGACCTTTCAAATGCAGTAGATTCA |
| *Ifna4* | Forward | ACCCACAGCCCAGAGAGTGACC |
|  | Reverse | AGGCCCTCTTGTTCCCGAGGT |
| *Sting1* | Forward | TGTGGCTGCTGATGCCATAC |
|  | Reverse | TGGAGTCAAGCTCTGAAGGC |
